# Supplementary material for: Designing electrolyte structure to suppress hydrogen evolution reaction in aqueous batteries
Source: Research Square preprint supplement (doi:10.21203/rs.3.rs-95916/v1), 2020-11-03
Supplement: Supplementary file 1 [file 0469567c1d8ede8f41b4e6a9.pdf]

# Supplementary Information

## **Designing electrolyte structure to suppress hydrogen evolution reaction in aqueous batteries**

Qingshun Nian et al.

## Supplementary Figures

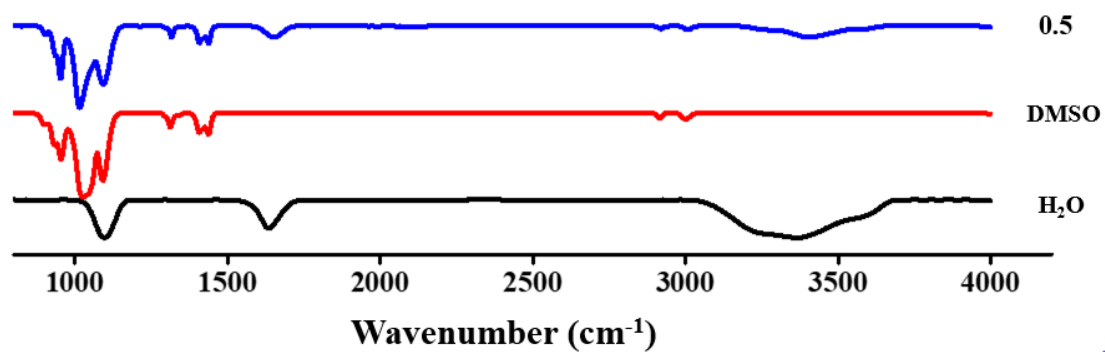

**Supplementary Fig. 1 Component analysis of DMSO and water mixed solution.** FTIR spectra of pure water, pure DMSO and DMSO/water mixed solution.

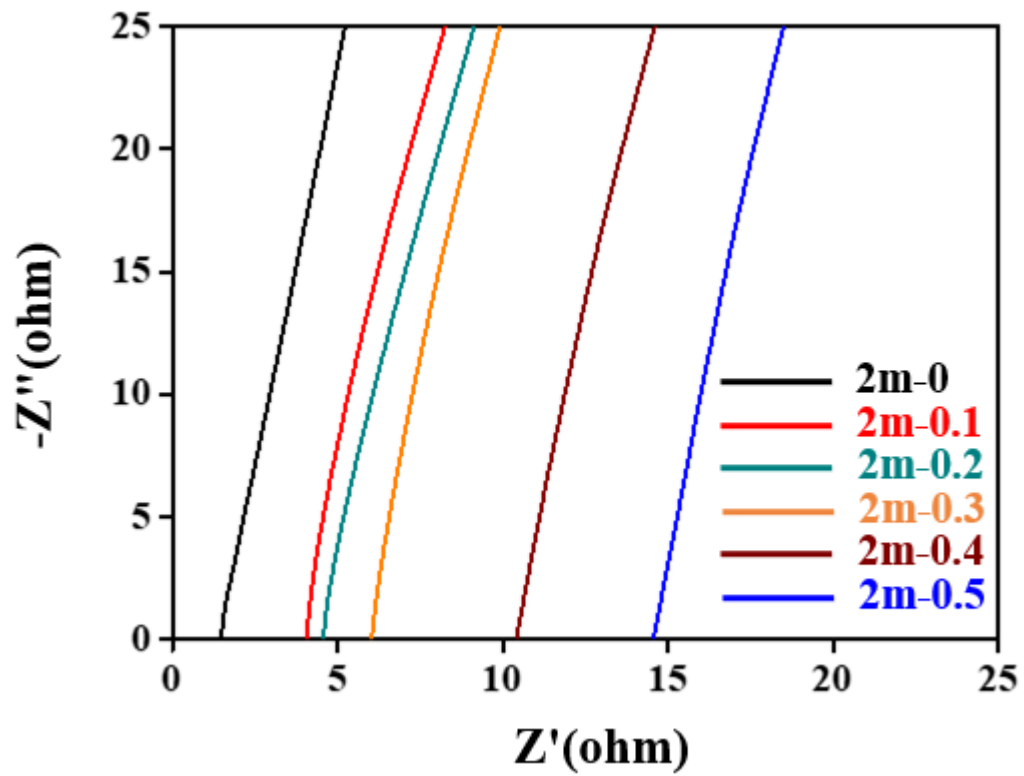

**Supplementary Fig. 2 Electrolyte impedance analysis.** Electrochemical impedance spectroscopy (EIS) of 2 m NaClO<sub>4</sub> with different mole fractions of DMSO.

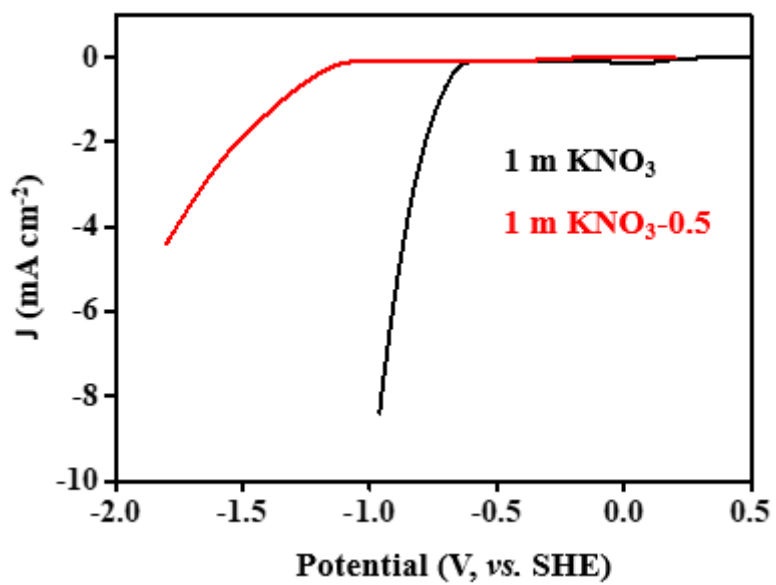

**Supplementary Fig. 3 Hydrogen evolution window.** Linear voltammetry curves recorded at 10 mVs<sup>-1</sup> in 1 m KNO<sub>3</sub> and 1 m KNO<sub>3</sub>-0.5 aqueous electrolytes.

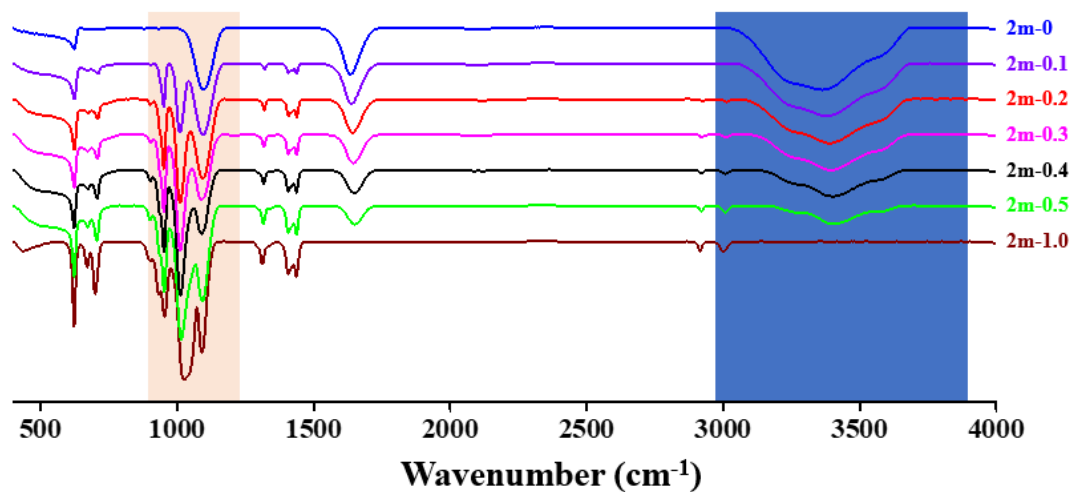

**Supplementary Fig. 4 FTIR spectra of electrolyte.** FTIR spectra of 2 m NaClO<sub>4</sub> with different mole fractions of DMSO (0, 0.1, 0.2, 0.3, 0.4, 0.5, 1.0), from which can be detected that the signal at maroon area is the S=O vibration band, and blue area is the O-H stretching band of water.

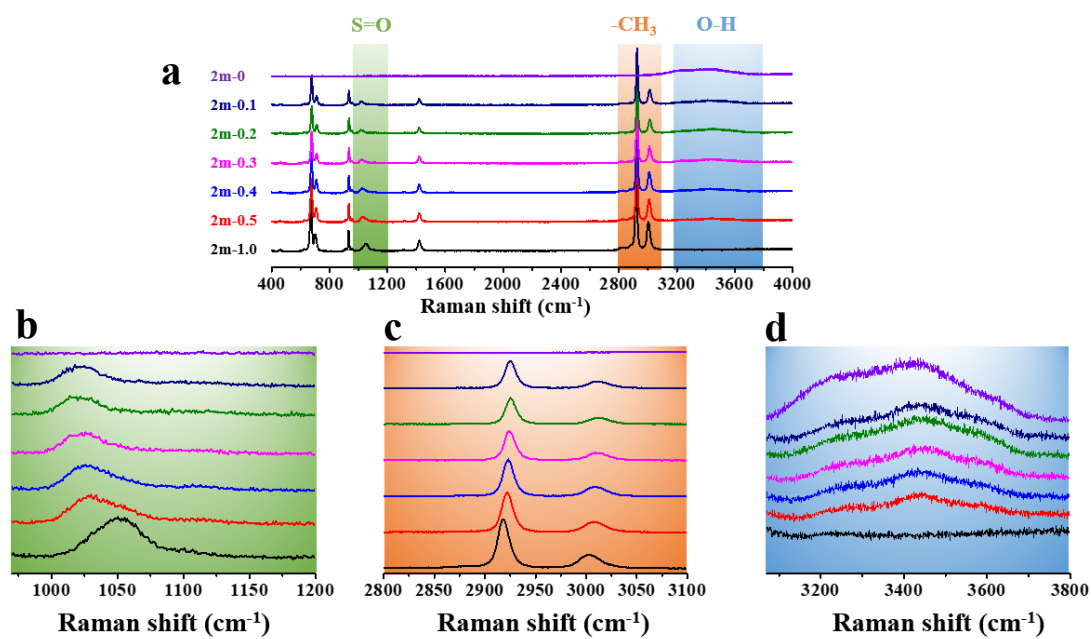

**Supplementary Fig. 5 Raman spectra of electrolyte.** **a** Raman spectra of 2 m NaClO<sub>4</sub> with different mole fractions of DMSO (0, 0.1, 0.2, 0.3, 0.4, 0.5, 1.0). **b, c, d** Partial enlargement view of Fig. **a**.

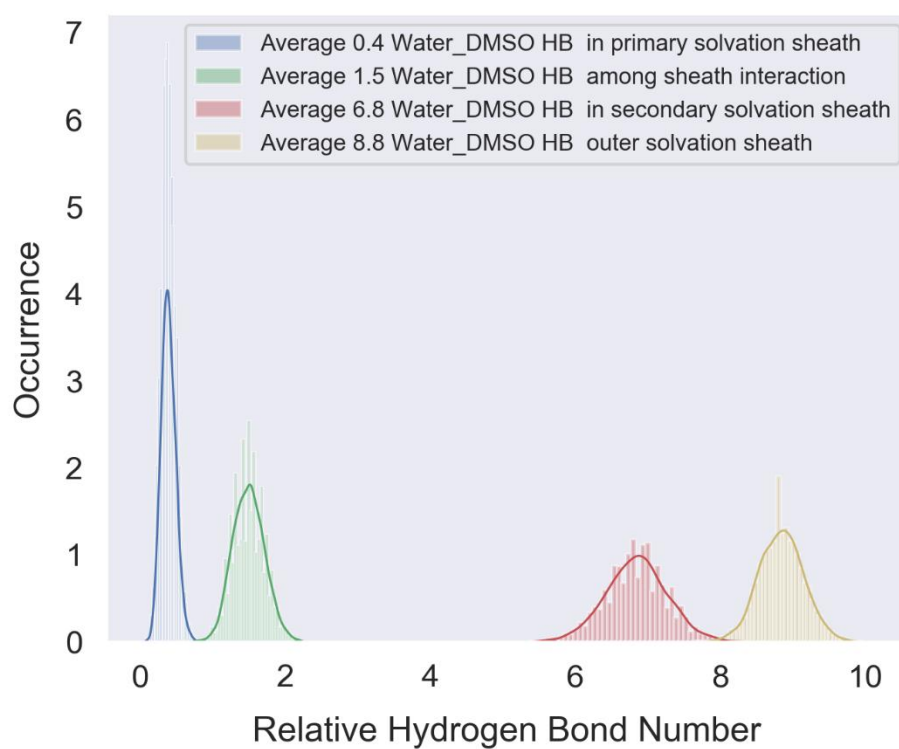

**Supplementary Fig. 6** Relative hydrogen bond number distribution within  $\text{Na}^+$  hydration sheath in 2 m-0.5  $\text{NaClO}_4$ -DMSO system.

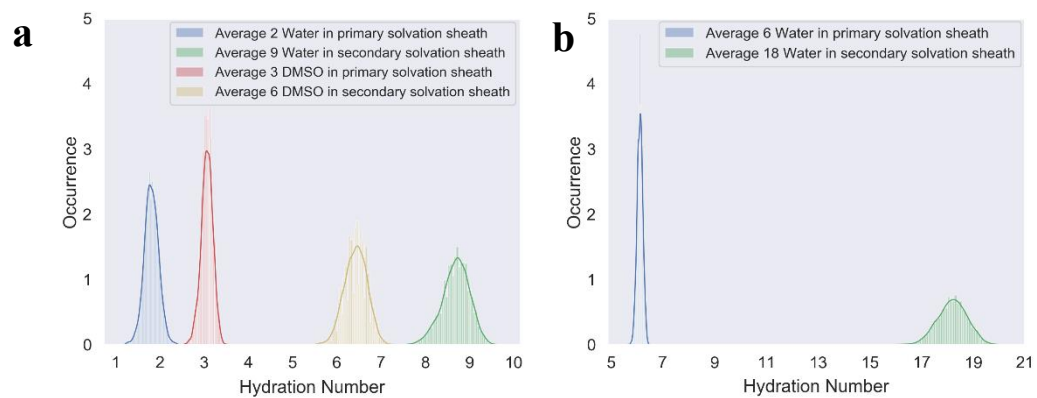

**Supplementary Fig. 7** Hydration number distribution in different sheath for systems of a) 2 m-0.5 NaClO<sub>4</sub>-DMSO and b) 2 m NaClO<sub>4</sub>



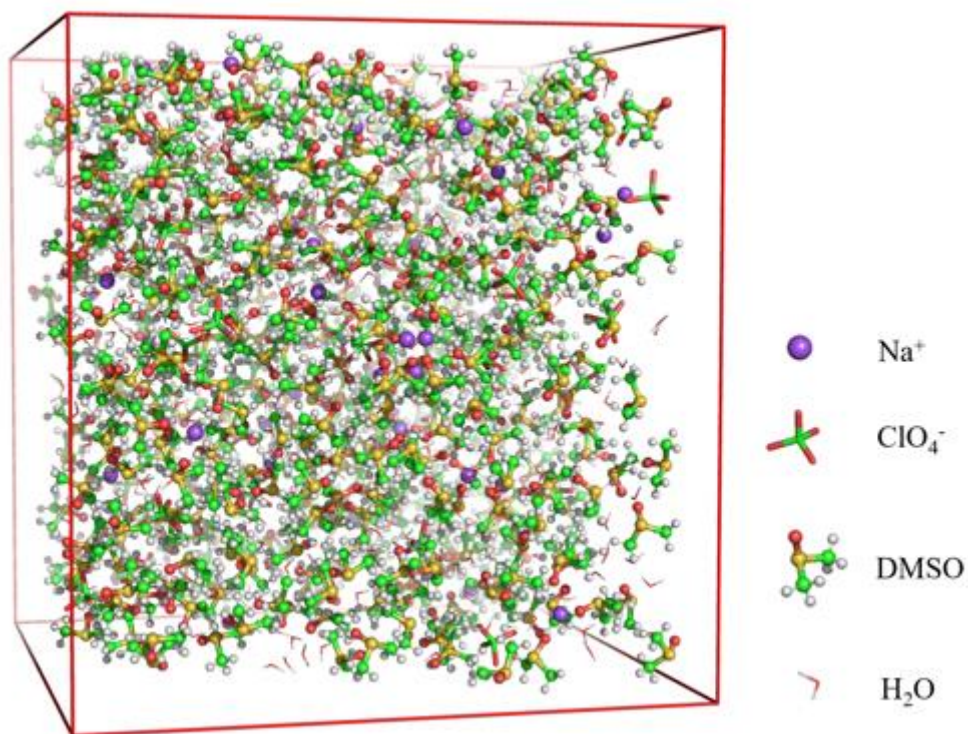

**Supplementary Fig. 8 MD simulations of the Na<sup>+</sup>-solvation structure.**

Snapshots of MD simulation boxes for systems of 2 m-0.5 NaClO<sub>4</sub>-DMSO at 100 ns timestamp.

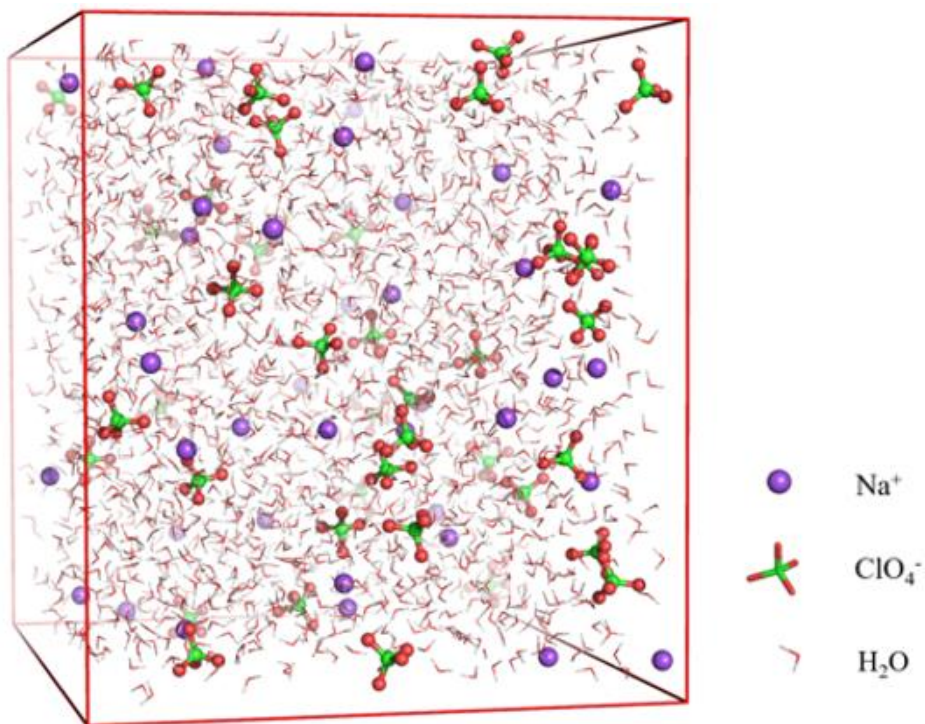

**Supplementary Fig. 9 MD simulations of the Na<sup>+</sup>-solvation structure.**

Snapshots of MD simulation boxes for systems of 2 m NaClO<sub>4</sub> at 100ns timestamp.

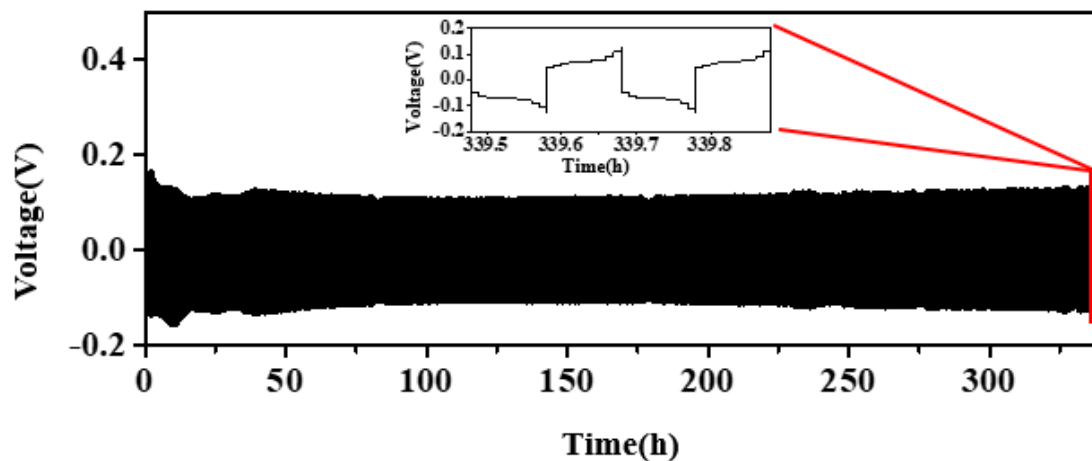

**Supplementary Fig.10 Galvanostatic cycling performance of symmetric Zn/Zn cells tests using 2 m  $\text{Zn}(\text{CF}_3\text{SO}_3)_2\text{-}0.5$  electrolyte. High rate of  $5 \text{ mA cm}^{-2}$  ( $0.5 \text{ mAh cm}^{-2}$  for each half cycle).**

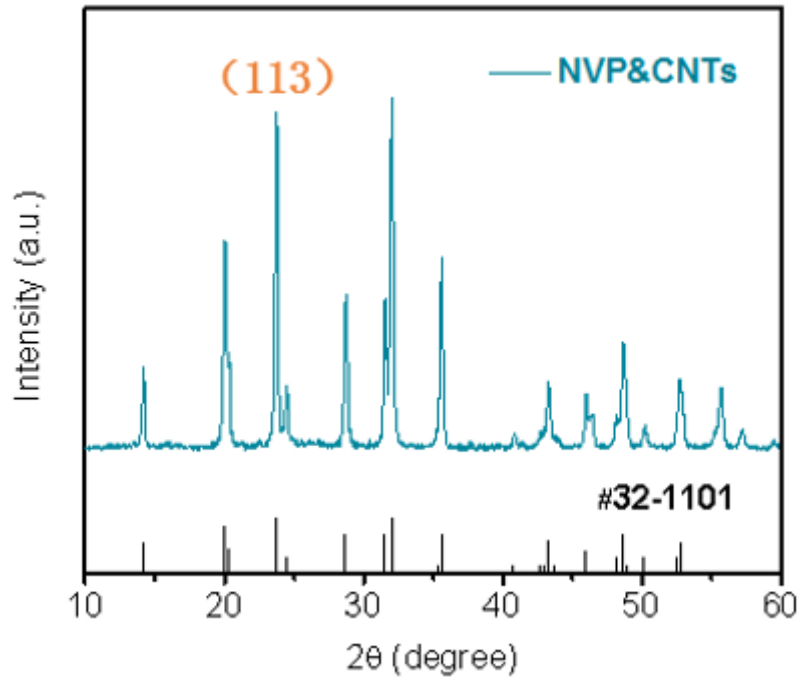

**Supplementary Fig. 11 Characterization of as-prepared  $\text{Na}_3\text{V}_2(\text{PO}_4)_3$ &CNTs (NVP&CNTs) powder.** XRD pattern. It can be detected from the XRD pattern that all the diffraction peaks are accurately indexed to the NASICON structured NVP with  $R\bar{3}c$  space group (JCPDS No. 32-1101), which demonstrated the successful preparation of NVP&CNTs.

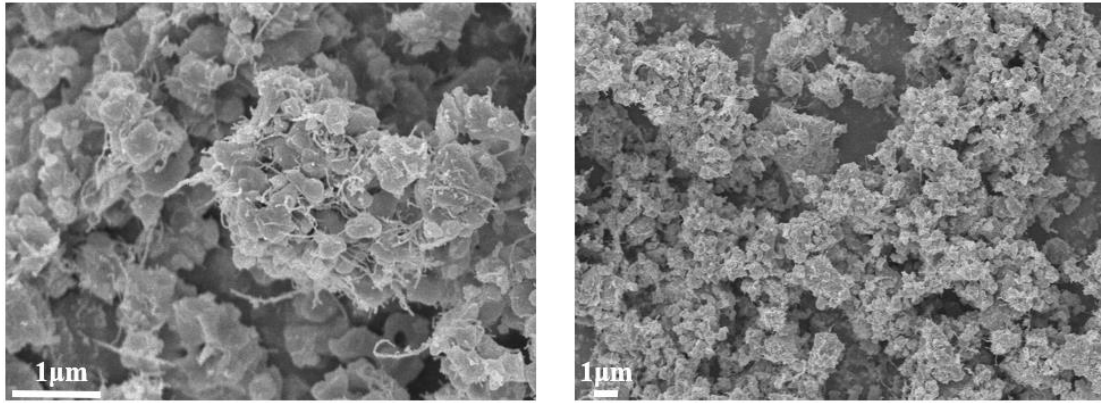

**Supplementary Fig. 12 Morphology analysis of the electrode materials.**

SEM of NVP&CNTs indicate that the NVP cross-linked with CNTs.

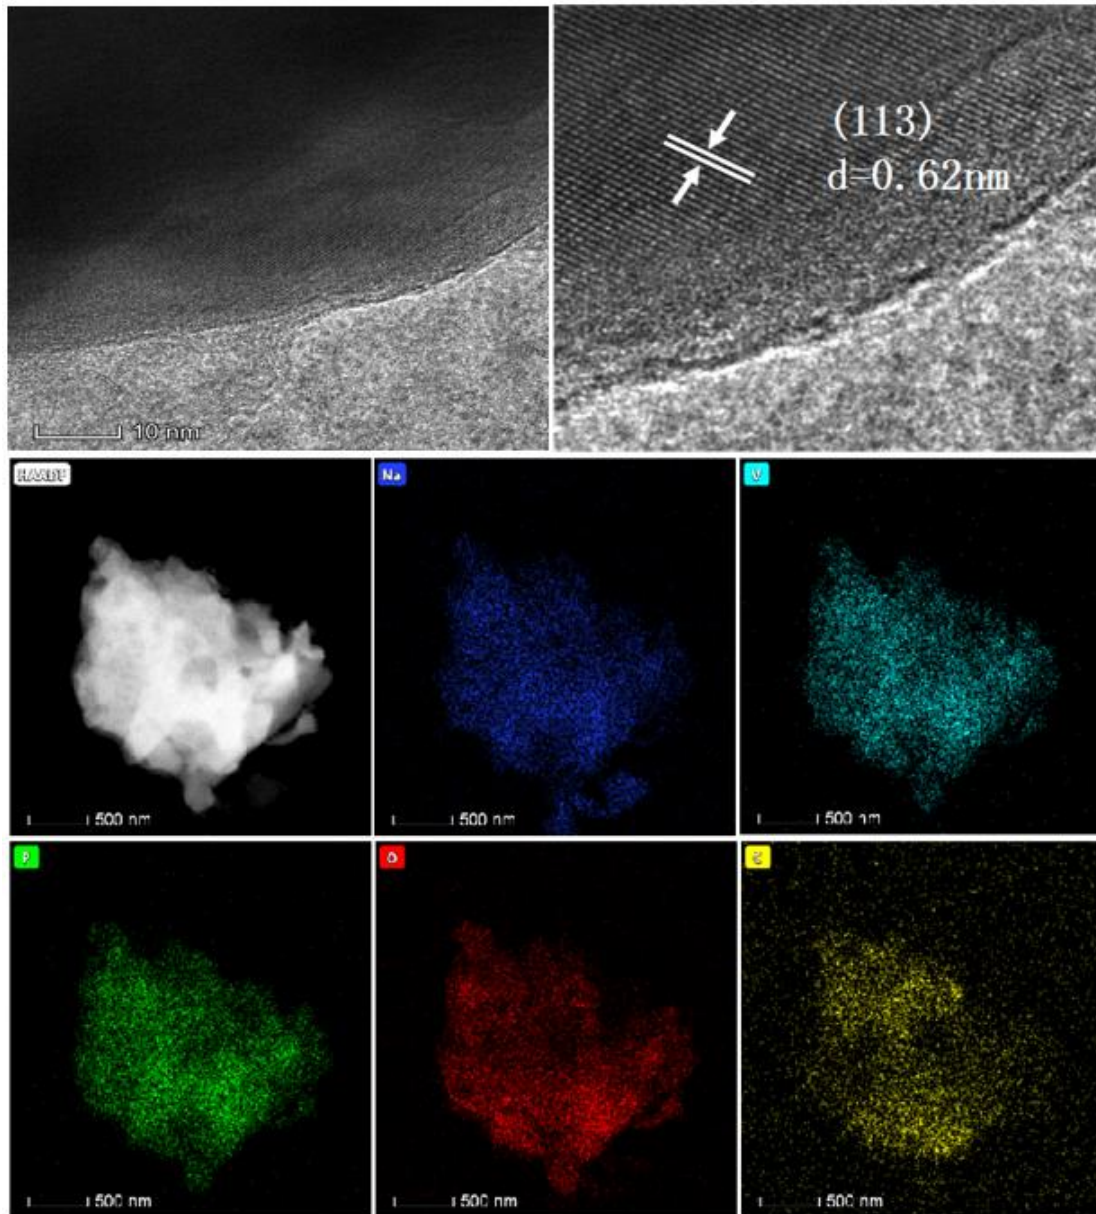

**Supplementary Fig. 13 TEM images of NVP&CNTs.** The TEM image of shows the cross-linked composite of NVP and CNTs, which can provide effective and intimate contact between NVP and CNTs. The d-spacing of 0.62 nm corresponds to the (113) crystal plane of NVP, suggesting its highly crystalline characteristics. TEM-EDS mapping shows the uniform distribution of Na, V, P, O and C.

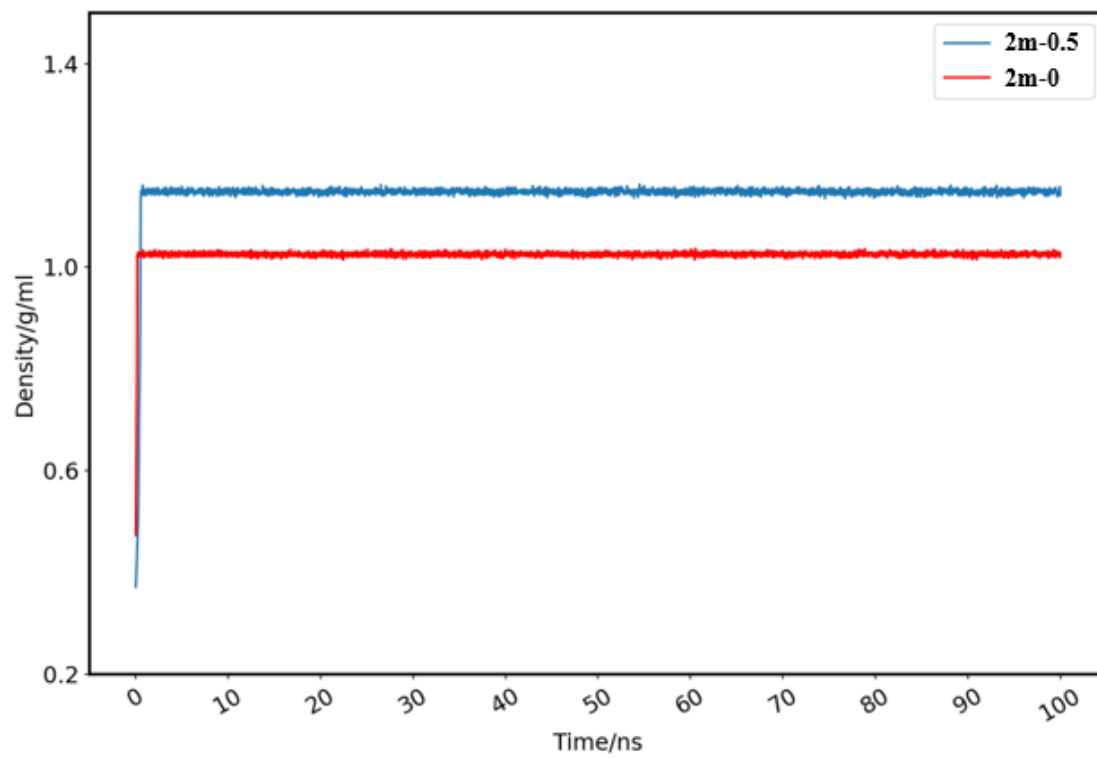

**Supplementary Fig.14** System density profile during 100 ns MD simulation.

Supplementary Table 1. Force Field Parameters used in this study

| Bonds                       | $K_b(\text{kcal mol}^{-1}\text{\AA}^{-2})$       | $r_0(\text{\AA})$                              |            |             |  |
|-----------------------------|--------------------------------------------------|------------------------------------------------|------------|-------------|--|
| S-O                         | 570.0                                            | 1.53                                           |            |             |  |
| C-S                         | 227.0                                            | 1.81                                           |            |             |  |
| C-H                         | 340.0                                            | 1.09                                           |            |             |  |
| Cl-O(NaClO <sub>4</sub> )   | 216.0                                            | 1.76                                           |            |             |  |
| HW-HW                       | 553.0                                            | 1.51                                           |            |             |  |
| OW-HW                       | 553.0                                            | 0.96                                           |            |             |  |
| Angles                      | $K_\theta(\text{kcal mol}^{-1}\text{ rad}^{-2})$ | $\theta_0(\text{deg})$                         |            |             |  |
| H-C-S                       | 50.0                                             | 109.50                                         |            |             |  |
| C-S-C                       | 62.0                                             | 97.40                                          |            |             |  |
| O-S-C                       | 80.0                                             | 106.75                                         |            |             |  |
| H-C-H                       | 35.0                                             | 109.50                                         |            |             |  |
| O-Cl-O(NaClO <sub>4</sub> ) | 70.0                                             | 109.47                                         |            |             |  |
| HW-OW-HW                    | 100.0                                            | 104.52                                         |            |             |  |
| HW-HW-OW                    | 0.0                                              | 127.74                                         |            |             |  |
| Dihedral                    | IDIVF <sup>a</sup>                               | $K_\phi(\text{kcal mol}^{-1}\text{ rad}^{-2})$ | Phase(deg) | Periodicity |  |
| X-S-C-X                     | 3.0                                              | 0.85                                           | 0          | 3           |  |

<sup>a</sup> Factor by which the torsional barrier  $K_\phi$  is divided



Supplementary Table 2. Details of the simulated models

|                                              | 2m NaClO <sub>4</sub> - 0.5 X <sub>DMSO</sub> | 2m NaClO <sub>4</sub> - 0 X <sub>DMSO</sub> |
|----------------------------------------------|-----------------------------------------------|---------------------------------------------|
| <b>Number of NaClO<sub>4</sub></b>           | 40                                            | 40                                          |
| <b>Number of DMSO</b>                        | 428                                           | 0                                           |
| <b>Number of Water</b>                       | 482                                           | 2181                                        |
| <b>Equilibrium volume(Å<sup>3</sup>)</b>     | 66628.34                                      | 70044.86                                    |
| <b>Temperature(K)</b>                        | 300K                                          | 300K                                        |
| <b>Equilibrium density(g/cm<sup>3</sup>)</b> | 1.15                                          | 1.01                                        |
